# Supplementary material for: Noble metal-modified titania with visible-light activity for the decomposition of microorganisms
Source: PubMed Central journal article supplement (PMC5852454; doi:10.3762/bjnano.9.77), 2018-03-07
Supplement: Beilstein_J_Nanotechnol-09-829-s001.pdf [file Beilstein_J_Nanotechnol-09-829-s001.pdf]

# Supporting Information

for

## **Noble metal-modified titania with visible-light activity for the decomposition of microorganisms**

Maya Endo<sup>1</sup>, Zhishun Wei<sup>1,2</sup>, Kunlei Wang<sup>1,3</sup>, Baris Karabiyik<sup>1</sup>, Kenta Yoshiiri<sup>1,3</sup>, Paulina Rokicka<sup>1,4</sup>, Bunsho Ohtani<sup>1,3</sup>, Agata Markowska-Szczupak\*<sup>1,4</sup> and Ewa Kowalska\*<sup>1,3</sup>

Address: <sup>1</sup>Institute for Catalysis, Hokkaido University, N21 W10, 001-0021 Sapporo, Japan, <sup>2</sup>School of Materials and Chemical Engineering, Hubei University of Technology, 430068 Wuhan, China, <sup>3</sup>Graduate School of Environmental Science, N10 W5, 060-0810 Sapporo, Japan and <sup>4</sup> Institute of Inorganic Technology and Environment Engineering, West Pomeranian University of Technology, Szczecin, Pulaskiego 10, 70-322 Szczecin, Poland

Email: Ewa Kowalska\* - kowalska@cat.hokudai.ac.jp;  
Agata Markowska-Szczupak\* - agata@erb.pl

\* Corresponding author

**Table S1:** The mortality rate (%) of *E. coli* bacteria

|      | TiO <sub>2</sub> (ST01) | TiO <sub>2</sub> (TIO6) | TiO <sub>2</sub> (ST41) | Au/TiO <sub>2</sub> (ST01) | Au/TiO <sub>2</sub> (TIO6) | Au/TiO <sub>2</sub> (ST41) |
|------|-------------------------|-------------------------|-------------------------|----------------------------|----------------------------|----------------------------|
| Dark | 15.38                   | 23.72                   | 16.40                   | 50.00                      | 43.85                      | 63.22                      |
| Vis  | 23.20                   | 25.75                   | 27.92                   | 97.10                      | 94.64                      | 80.41                      |
| UV-A | 93.12                   | 64.74                   | 63.23                   | 96.23                      | 77.47                      | 94.23                      |

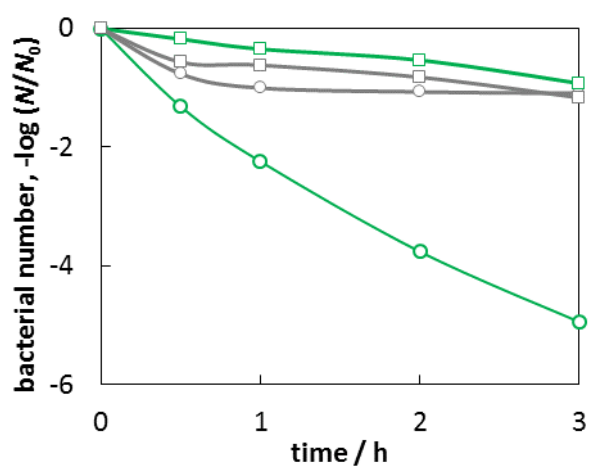

**Figure S1:** Number of *E. coli* bacteria during inactivation of bacterial cells in the dark (grey symbols) and under vis irradiation ( $\lambda > 420$  nm; green symbols) on bare (squares) and gold-modified titania (TIO12, circles).

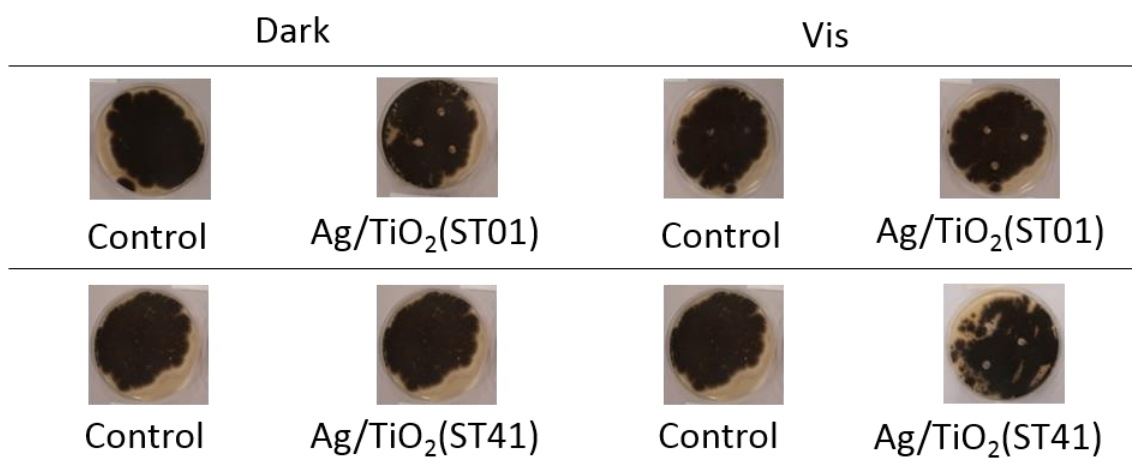

**Figure S2:** Antifungal activity of silver-modified photocatalyst against *A. niger* after 72 h in the dark condition and under visible light.

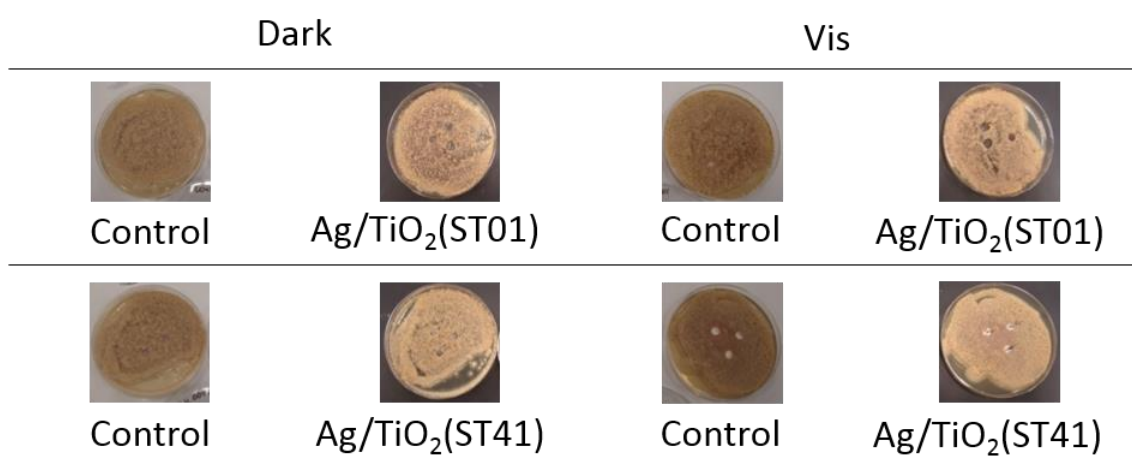

**Figure S3:** Antifungal activity of silver-modified photocatalyst against *A. melleus* after 72 h in the dark condition and under visible light.

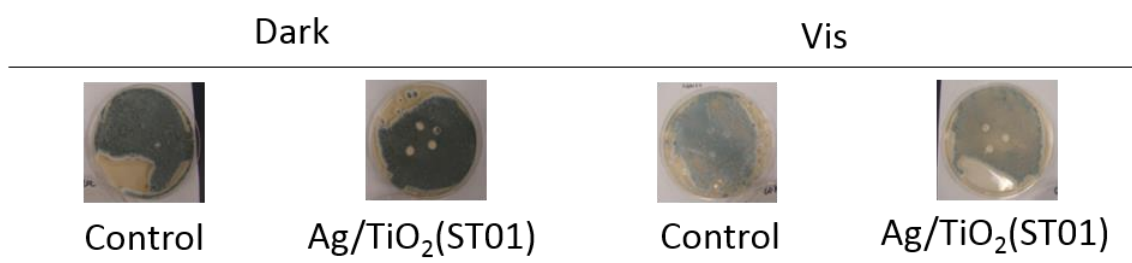

**Figure S4:** Antifungal activity of silver-modified photocatalyst against *P. chrysogenum* after 48 h in the dark condition and under visible light.

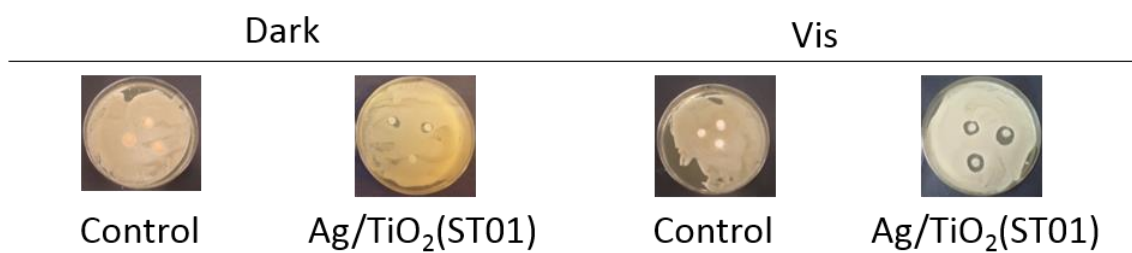

**Figure S5:** Antifungal activity of silver-modified photocatalysts against *C. albicans* after 48 h in the dark condition and under visible light.

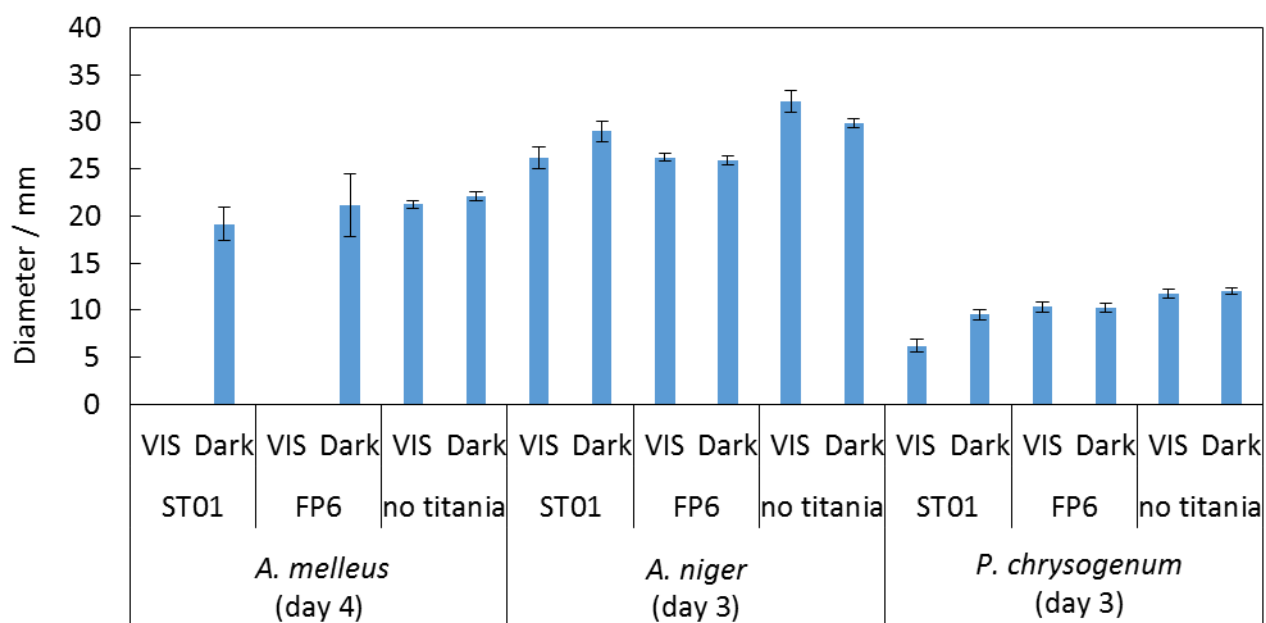

**Figure S6:** Antifungal activity of bare titania photocatalysts against *A. melleus* (day 4), *A. niger* (day 3) and *P. chrysogenum* (day 3).

**Table S2:** Summary of antifungal properties of bare titania photocatalysts

|                                  |            |      | average of mycelium diameter (mm) | S.D. | Student's t test against V/D MEA | spore color | spore size   |
|----------------------------------|------------|------|-----------------------------------|------|----------------------------------|-------------|--------------|
| <i>A. melleus</i><br>(day 4)     | ST01       | VIS  | 0                                 | 0    | 0                                | -           | -            |
|                                  |            | Dark | 19.2                              | 1.72 | 0.0163                           | white       | -            |
|                                  | FP6        | VIS  | 0                                 | 0    | 0                                | -           | -            |
|                                  |            | Dark | 21.2                              | 3.37 | 0.5670                           | brown       | middle       |
|                                  | no titania | VIS  | 21.3                              | 0.42 |                                  | brown       | large        |
|                                  |            | Dark | 22.1                              | 0.49 |                                  | brown       | large        |
| <i>A. niger</i><br>(day 3)       | ST01       | VIS  | 26.2                              | 1.17 | 0.0011                           | black       | small        |
|                                  |            | Dark | 29.0                              | 1.10 | 0.1589                           | white       | -            |
|                                  | FP6        | VIS  | 26.3                              | 0.42 | 0.0001                           | black       | middle       |
|                                  |            | Dark | 25.9                              | 0.49 | 0.0000                           | black       | middle       |
|                                  | no titania | VIS  | 32.2                              | 1.17 |                                  | black       | large        |
|                                  |            | Dark | 29.9                              | 0.49 |                                  | black       | large        |
| <i>P. chrysogenum</i><br>(day 3) | ST01       | VIS  | 6.2                               | 0.68 | 0.0000                           | White-blue  | ex-small     |
|                                  |            | Dark | 9.5                               | 0.55 | 0.0002                           | -           | -            |
|                                  | FP6        | VIS  | 10.3                              | 0.52 | 0.0075                           | blue        | small-middle |
|                                  |            | Dark | 10.3                              | 0.42 | 0.0002                           | blue        | small-middle |
|                                  | no titania | VIS  | 11.8                              | 0.42 |                                  | blue        | large        |
|                                  |            | Dark | 12.0                              | 0.32 |                                  | blue        | large        |

*A. melleus*, Vis, 4 days

ST01

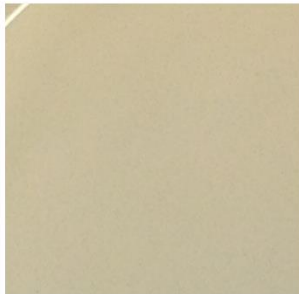

No colony  
No spores

FP6

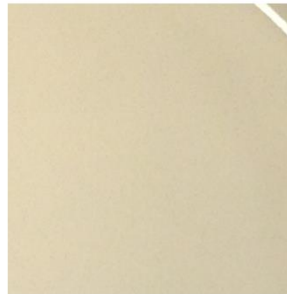

No colony  
No spores

no titania

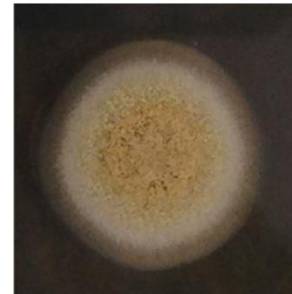

Large colony  
Large spores

*A. niger*, Vis, 3 days

ST01

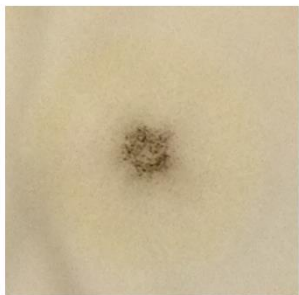

Large colony  
Small spores

FP6

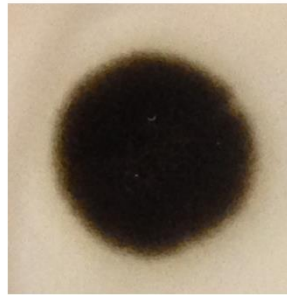

Small colony  
Large spores

no titania

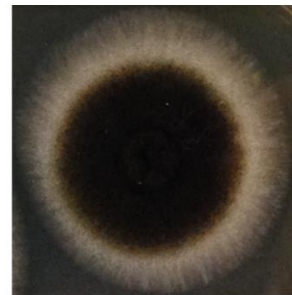

Large colony  
Large spores

*P. chrysogenum*, Vis, 3 days

ST01

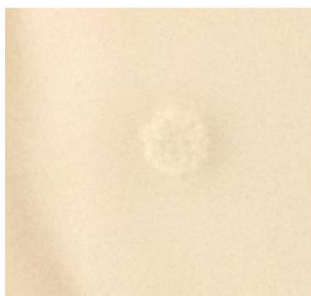

Small colony  
No spores

FP6

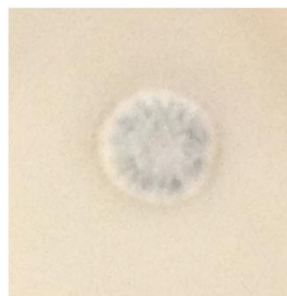

Small-middle colony  
Small spores

no titania

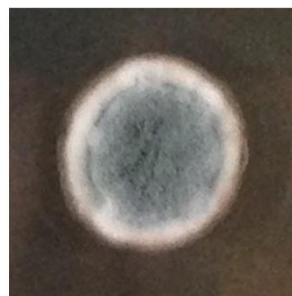

Large colony  
Large spores

**Figure S7:** Photographs of mycelium during tests of antifungal properties of bare titania photocatalysts.

**Table S3:** Summary of antifungal properties of bare and gold-modified titania ST01

|                                  |            |      | average of mycelium diameter (mm) | S.D. | Student's t test against V/D MEA | spore color | spore size | droplet (toxin) |
|----------------------------------|------------|------|-----------------------------------|------|----------------------------------|-------------|------------|-----------------|
| <i>A. melleus</i><br>(day 4)     | Au/ST01    | VIS  | 18.3                              | 0.52 | 0.0001                           | white       | ex-small   | none            |
|                                  |            | Dark | 16.0                              | 1.26 | 0.0001                           | white       | ex-small   | none            |
|                                  | ST01       | VIS  | 5.0                               | 0.00 | 0.0000                           | white       | -          | none            |
|                                  |            | Dark | 18.5                              | 1.05 | 0.0004                           | white       | -          | none            |
|                                  | no titania | VIS  | 22.3                              | 0.52 |                                  | yellow      | large      | none            |
|                                  |            | Dark | 22.0                              | 0.00 |                                  | yellow      | large      | none            |
| <i>P. chrysogenum</i><br>(day 4) | Au/ST01    | VIS  | 15.3                              | 0.82 | 0.0000                           | white       | -          | none            |
|                                  |            | Dark | 12.7                              | 1.51 | 0.0001                           | white       | -          | none            |
|                                  | ST01       | VIS  | 10.0                              | 0.89 | 0.0000                           | blue        | middle     | none            |
|                                  |            | Dark | 15.5                              | 0.55 | 0.0000                           | White-blue  | small      | none            |
|                                  | no titania | VIS  | 19.3                              | 0.52 |                                  | blue        | large      | yellow          |
|                                  |            | Dark | 20.3                              | 0.42 |                                  | blue        | large      | yellow          |

Fluorescence light

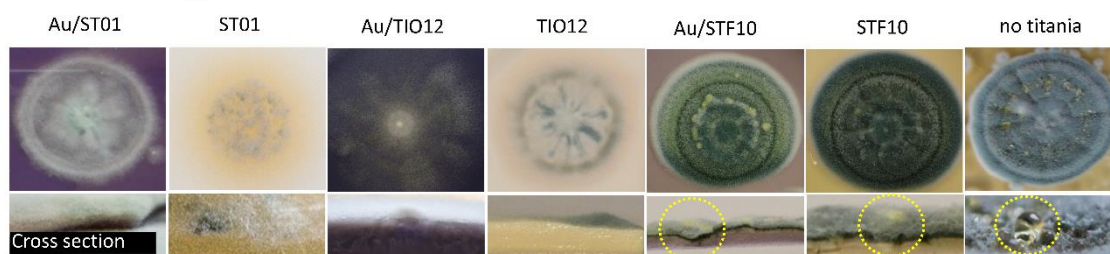

Dark

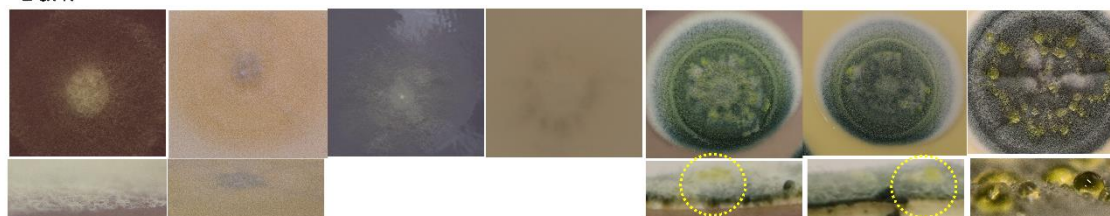

**Figure S8:** Representative photographs of *P. chrysogenum* with Au/TiO<sub>2</sub>(ST01), TiO<sub>2</sub>(ST01), Au/TiO<sub>2</sub>(TiO12), TiO<sub>2</sub>(TiO12), Au/TiO<sub>2</sub>(STF10), TiO<sub>2</sub>(STF10) and without titania under fluorescence light irradiation and in the dark. Dashed circles indicate the droplets (with possible presence of mycotoxins).

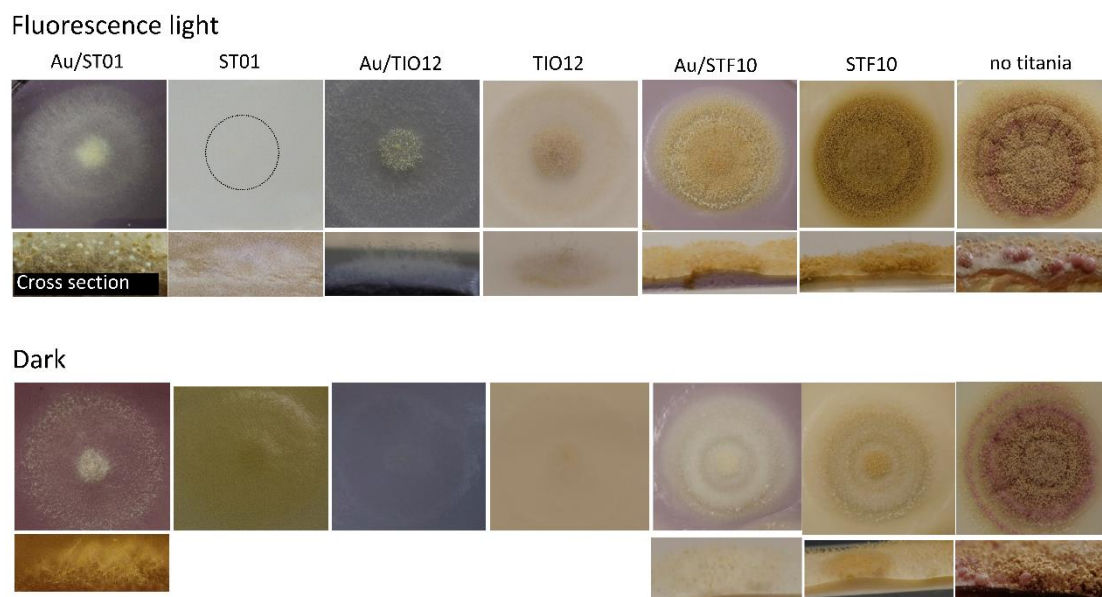

**Figure S9:** Representative photographs of *A. melleus* with Au/TiO<sub>2</sub>(ST01), TiO<sub>2</sub>(ST01), Au/TiO<sub>2</sub>(TiO12), TiO<sub>2</sub>(TiO12), Au/TiO<sub>2</sub>(STF10), TiO<sub>2</sub>(STF10) and without titania under fluorescence light irradiation and in the dark.



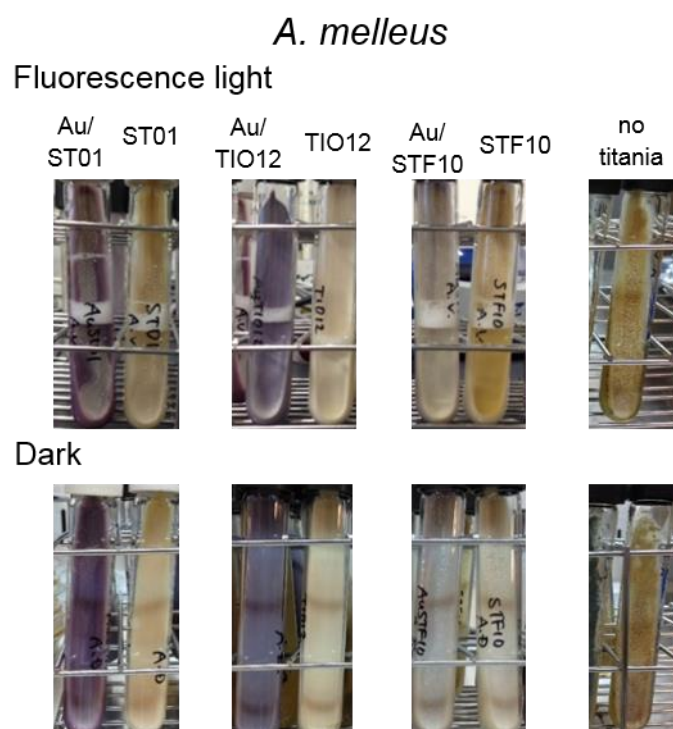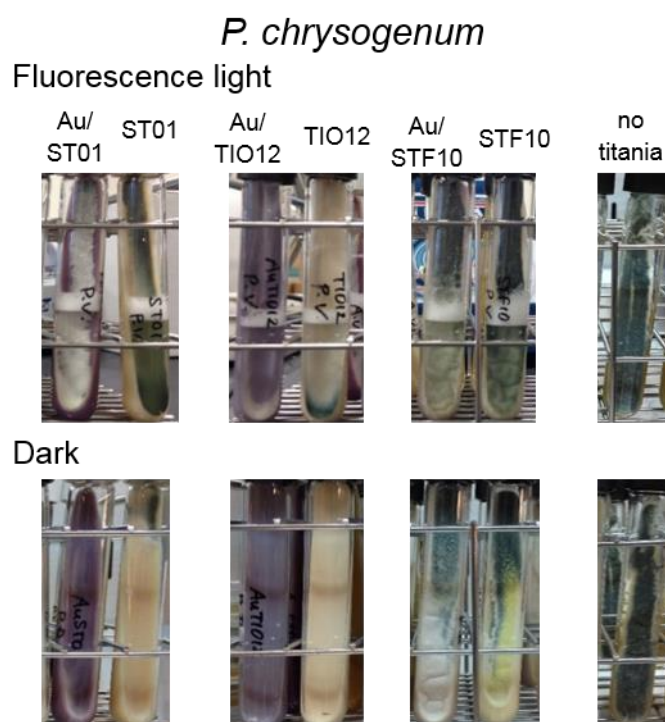

**Figure S10:** Representative photographs of 5-d growth of *A. melleus* (top) and *P. chrysogenum* (bottom) with Au/TiO<sub>2</sub>(ST01), TiO<sub>2</sub>(ST01), Au/TiO<sub>2</sub>(TIO12), TiO<sub>2</sub>(TIO12), Au/TiO<sub>2</sub>(STF10), TiO<sub>2</sub>(STF10) and no titania samples under fluorescence light irradiation and in the dark.

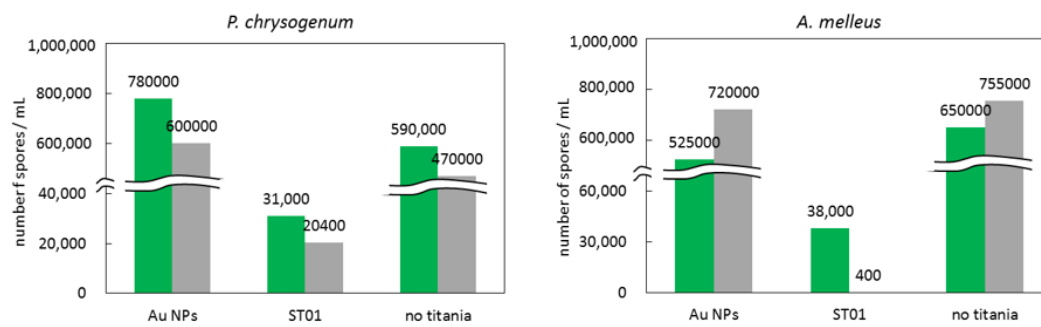

**Figure S11:** Sporulation of 4-d growth *P. chrysogenum* (left) and *A. melleus* (right) with Au NPs, TiO<sub>2</sub>(ST01) and without titania under vis (green) and in the dark (grey).
